# Supplementary material
Source: publisher figshare collection journal article supplement (https://tandf.figshare.com/articles/dataset/_/7258046)
Supplement: Supplementary file 1 [file 1]

**Supplemental Table 1.**

**Harris, K.P., Littleton, J.T., & Stewart, B.A.**

**Postsynaptic Syntaxin 4 negatively regulates the efficiency of neurotransmitter release.**

**Sample size (n), mean, SEM, and pairwise statistical comparisons for all Figures.**

**Figure 1A: EJP amplitude**

| Genotype                                     | n  | mean  | SEM  |
|----------------------------------------------|----|-------|------|
| Control                                      | 12 | 6.40  | 0.62 |
| <i>Syx4</i> <sup>73</sup>                    | 12 | 15.44 | 1.70 |
| <i>Syx4</i> <sup>73</sup> 24B-GAL4>UAS-Syx4  | 12 | 6.54  | 0.86 |
| <i>Syx4</i> <sup>73</sup> elav-GAL4>UAS-Syx4 | 10 | 14.72 | 1.22 |
| 24B-GAL4>UAS-Syx4                            | 10 | 6.90  | 0.58 |

| ANOVA (Tukey's multiple comparisons test)                                  | Summary | Adjusted P Value |
|----------------------------------------------------------------------------|---------|------------------|
| Control vs. <i>Syx4</i> <sup>73</sup>                                      | ***     | < 0.0001         |
| Control vs. <i>Syx4</i> <sup>73</sup> 24B-GAL4>UAS-Syx4                    | ns      | > 0.999          |
| Control vs. <i>Syx4</i> <sup>73</sup> elav-GAL4>UAS-Syx4                   | ***     | < 0.0001         |
| Control vs. 24B-GAL4>UAS-Syx4                                              | ns      | 0.998            |
| <i>Syx4</i> <sup>73</sup> vs. <i>Syx4</i> <sup>73</sup> 24B-GAL4>UAS-Syx4  | ***     | < 0.0001         |
| <i>Syx4</i> <sup>73</sup> vs. <i>Syx4</i> <sup>73</sup> elav-GAL4>UAS-Syx4 | ns      | 0.991            |

**Resting Membrane Potential**

| Genotype                                     | n  | mean   | SEM  |
|----------------------------------------------|----|--------|------|
| Control                                      | 17 | -56.92 | 1.62 |
| <i>Syx4</i> <sup>73</sup>                    | 15 | -57.50 | 1.69 |
| <i>Syx4</i> <sup>73</sup> 24B-GAL4>UAS-Syx4  | 11 | -57.42 | 1.67 |
| <i>Syx4</i> <sup>73</sup> elav-GAL4>UAS-Syx4 | 11 | -58.10 | 2.29 |
| 24B-GAL4>UAS-Syx4                            | 10 | -56.70 | 1.80 |

| ANOVA (Tukey's multiple comparisons test)                                  | Summary | Adjusted P Value |
|----------------------------------------------------------------------------|---------|------------------|
| Control vs. <i>Syx4</i> <sup>73</sup>                                      | ns      | 0.999            |
| Control vs. <i>Syx4</i> <sup>73</sup> 24B-GAL4>UAS-Syx4                    | ns      | >0.999           |
| Control vs. <i>Syx4</i> <sup>73</sup> elav-GAL4>UAS-Syx4                   | ns      | 0.991            |
| Control vs. 24B-GAL4>UAS-Syx4                                              | ns      | >0.999           |
| <i>Syx4</i> <sup>73</sup> vs. <i>Syx4</i> <sup>73</sup> 24B-GAL4>UAS-Syx4  | ns      | >0.999           |
| <i>Syx4</i> <sup>73</sup> vs. <i>Syx4</i> <sup>73</sup> elav-GAL4>UAS-Syx4 | ns      | 0.999            |

**Figure 1C: Mini Frequency**

| Genotype                               | n  | Mean | Std. Error of Mean |
|----------------------------------------|----|------|--------------------|
| Control                                | 17 | 2.62 | 0.31               |
| <i>Syx4</i> <sup>73</sup>              | 15 | 3.42 | 0.32               |
| <i>Syx4</i> <sup>73</sup> 24B>UAS-Syx4 | 11 | 2.57 | 0.18               |
| <i>Syx4</i> <sup>73</sup> elav>Syx4    | 11 | 2.88 | 0.15               |
| 24B>UAS-Syx4                           | 10 | 2.70 | 0.25               |

| ANOVA (Tukey's multiple comparisons test)          | Summary | Adjusted P Value |
|----------------------------------------------------|---------|------------------|
| Control vs. <i>Syx4</i> <sup>73</sup>              | ns      | 0.172            |
| Control vs. <i>Syx4</i> <sup>73</sup> 24B>UAS-Syx4 | ns      | >0.999           |
| Control vs. <i>Syx4</i> <sup>73</sup> elav>Syx4    | ns      | 0.959            |
| Control vs. 24B>UAS-Syx4                           | ns      | >0.999           |

**Figure 1D: Mini Amplitude**

| Genotype                                       | n  | mean | SEM  |
|------------------------------------------------|----|------|------|
| Control                                        | 17 | 0.77 | 0.08 |
| <i>Syx4</i> <sup>73</sup>                      | 15 | 0.78 | 0.06 |
| <i>Syx4</i> <sup>73</sup> 24B>UAS- <i>Syx4</i> | 11 | 0.79 | 0.10 |
| <i>Syx4</i> <sup>73</sup> elav> <i>Syx4</i>    | 11 | 0.72 | 0.04 |
| 24B>UAS- <i>Syx4</i>                           | 10 | 0.79 | 0.06 |

| ANOVA (Tukey's multiple comparisons test)                  | Summary | Adjusted P Value |
|------------------------------------------------------------|---------|------------------|
| Control vs. <i>Syx4</i> <sup>73</sup>                      | ns      | >0.999           |
| Control vs. <i>Syx4</i> <sup>73</sup> 24B>UAS- <i>Syx4</i> | ns      | 0.883            |
| Control vs. <i>Syx4</i> <sup>73</sup> elav> <i>Syx4</i>    | ns      | 0.989            |
| Control vs. 24B>UAS- <i>Syx4</i>                           | ns      | 0.925            |

**Input resistance**

| Genotype                                       | n  | mean | SEM  |
|------------------------------------------------|----|------|------|
| Control                                        | 17 | 6.48 | 0.31 |
| <i>Syx4</i> <sup>73</sup>                      | 15 | 6.8  | 0.29 |
| <i>Syx4</i> <sup>73</sup> 24B>UAS- <i>Syx4</i> | 11 | 6.73 | 0.48 |
| <i>Syx4</i> <sup>73</sup> elav> <i>Syx4</i>    | 11 | 6.91 | 0.43 |
| 24B>UAS- <i>Syx4</i>                           | 10 | 6.79 | 0.38 |

| ANOVA (Tukey's multiple comparisons test)                  | Summary | Adjusted P Value |
|------------------------------------------------------------|---------|------------------|
| Control vs. <i>Syx4</i> <sup>73</sup>                      | ns      | 0.956            |
| Control vs. <i>Syx4</i> <sup>73</sup> 24B>UAS- <i>Syx4</i> | ns      | 0.986            |
| Control vs. <i>Syx4</i> <sup>73</sup> elav> <i>Syx4</i>    | ns      | 0.915            |
| Control vs. 24B>UAS- <i>Syx4</i>                           | ns      | 0.976            |

**Figure 2A: Paired-pulse facilitation**

| Genotype (interval)                                        | n  | mean | SEM  |
|------------------------------------------------------------|----|------|------|
| Control (25)                                               | 10 | 1.33 | 0.15 |
| Control (50)                                               | 10 | 1.46 | 0.11 |
| Control (75)                                               | 10 | 1.30 | 0.07 |
| Control (100)                                              | 10 | 1.25 | 0.04 |
| <i>Syx4</i> <sup>73</sup> (25)                             | 8  | 0.93 | 0.03 |
| <i>Syx4</i> <sup>73</sup> (50)                             | 8  | 1.09 | 0.02 |
| <i>Syx4</i> <sup>73</sup> (75)                             | 8  | 1.12 | 0.02 |
| <i>Syx4</i> <sup>73</sup> (100)                            | 8  | 1.09 | 0.01 |
| <i>Syx4</i> <sup>73</sup> 24B-GAL4>UAS- <i>Syx4</i> (25)   | 8  | 1.58 | 0.09 |
| <i>Syx4</i> <sup>73</sup> 24B-GAL4>UAS- <i>Syx4</i> (50)   | 8  | 1.73 | 0.12 |
| <i>Syx4</i> <sup>73</sup> 24B-GAL4>UAS- <i>Syx4</i> (75)   | 8  | 1.50 | 0.07 |
| <i>Syx4</i> <sup>73</sup> 24B-GAL4>UAS- <i>Syx4</i> (100)  | 8  | 1.51 | 0.09 |
| <i>Syx4</i> <sup>73</sup> elav-GAL4>UAS- <i>Syx4</i> (25)  | 8  | 1.05 | 0.03 |
| <i>Syx4</i> <sup>73</sup> elav-GAL4>UAS- <i>Syx4</i> (50)  | 8  | 1.04 | 0.01 |
| <i>Syx4</i> <sup>73</sup> elav-GAL4>UAS- <i>Syx4</i> (75)  | 8  | 1.06 | 0.01 |
| <i>Syx4</i> <sup>73</sup> elav-GAL4>UAS- <i>Syx4</i> (100) | 8  | 1.00 | 0.01 |
| 24B-GAL4>UAS- <i>Syx4</i> (25)                             | 6  | 1.27 | 0.16 |
| 24B-GAL4>UAS- <i>Syx4</i> (50)                             | 6  | 1.42 | 0.16 |
| 24B-GAL4>UAS- <i>Syx4</i> (75)                             | 6  | 1.28 | 0.10 |

|                         |   |      |      |
|-------------------------|---|------|------|
| 24B-GAL4>UAS-Syx4 (100) | 6 | 1.25 | 0.03 |
|-------------------------|---|------|------|

| <b>ANOVA (Tukey's multiple comparisons test)</b>                           | <b>Summary</b> | <b>Adjusted P Value</b> |
|----------------------------------------------------------------------------|----------------|-------------------------|
| <b>25 ms</b>                                                               |                |                         |
| Control vs. <i>Syx4</i> <sup>73</sup>                                      | *              | 0.040                   |
| Control vs. <i>Syx4</i> <sup>73</sup> 24B-GAL4>UAS-Syx4                    | ns             | 0.480                   |
| Control vs. <i>Syx4</i> <sup>73</sup> elav-GAL4>UAS-Syx4                   | ns             | 0.363                   |
| Control vs. 24B-GAL4>UAS-Syx4                                              | ns             | 0.996                   |
| <i>Syx4</i> <sup>73</sup> vs. <i>Syx4</i> <sup>73</sup> 24B-GAL4>UAS-Syx4  | **             | 0.004                   |
| <i>Syx4</i> <sup>73</sup> vs. <i>Syx4</i> <sup>73</sup> elav-GAL4>UAS-Syx4 | ns             | 0.948                   |
| <b>50 ms</b>                                                               |                |                         |
| Control vs. <i>Syx4</i> <sup>73</sup>                                      | *              | 0.047                   |
| Control vs. <i>Syx4</i> <sup>73</sup> 24B-GAL4>UAS-Syx4                    | ns             | 0.291                   |
| Control vs. <i>Syx4</i> <sup>73</sup> elav-GAL4>UAS-Syx4                   | *              | 0.021                   |
| Control vs. 24B-GAL4>UAS-Syx4                                              | ns             | 0.998                   |
| <i>Syx4</i> <sup>73</sup> vs. <i>Syx4</i> <sup>73</sup> 24B-GAL4>UAS-Syx4  | **             | 0.001                   |
| <i>Syx4</i> <sup>73</sup> vs. <i>Syx4</i> <sup>73</sup> elav-GAL4>UAS-Syx4 | ns             | 0.997                   |
| <b>75 ms</b>                                                               |                |                         |
| Control vs. <i>Syx4</i> <sup>73</sup>                                      | ns             | 0.254                   |
| Control vs. <i>Syx4</i> <sup>73</sup> 24B-GAL4>UAS-Syx4                    | ns             | 0.116                   |
| Control vs. <i>Syx4</i> <sup>73</sup> elav-GAL4>UAS-Syx4                   | *              | 0.041                   |
| Control vs. 24B-GAL4>UAS-Syx4                                              | ns             | >0.999                  |
| <i>Syx4</i> <sup>73</sup> vs. <i>Syx4</i> <sup>73</sup> 24B-GAL4>UAS-Syx4  | **             | 0.002                   |
| <i>Syx4</i> <sup>73</sup> vs. <i>Syx4</i> <sup>73</sup> elav-GAL4>UAS-Syx4 | ns             | 0.944                   |
| <b>100 ms</b>                                                              |                |                         |
| Control vs. <i>Syx4</i> <sup>73</sup>                                      | *              | 0.030                   |
| Control vs. <i>Syx4</i> <sup>73</sup> 24B-GAL4>UAS-Syx4                    | **             | 0.002                   |
| Control vs. <i>Syx4</i> <sup>73</sup> elav-GAL4>UAS-Syx4                   | **             | 0.002                   |
| Control vs. 24B-GAL4>UAS-Syx4                                              | ns             | > 0.999                 |
| <i>Syx4</i> <sup>73</sup> vs. <i>Syx4</i> <sup>73</sup> 24B-GAL4>UAS-Syx4  | ****           | < 0.0001                |
| <i>Syx4</i> <sup>73</sup> vs. <i>Syx4</i> <sup>73</sup> elav-GAL4>UAS-Syx4 | ns             | 0.702                   |

**Figure 3D: Cac-GFP/Brp**

| <b>Genotype</b>                              | <b>n</b> | <b>mean</b> | <b>SEM</b> |
|----------------------------------------------|----------|-------------|------------|
| Control                                      | 16       | 1.05        | 0.05       |
| <i>Syx4</i> <sup>73</sup>                    | 16       | 1.33        | 0.09       |
| <i>Syx4</i> <sup>73</sup> 24B-GAL4>UAS-Syx4  | 10       | 0.94        | 0.05       |
| <i>Syx4</i> <sup>73</sup> elav-GAL4>UAS-Syx4 | 13       | 1.32        | 0.13       |
| 24B-GAL4>UAS-Syx4                            | 12       | 0.93        | 0.10       |

| <b>ANOVA (Tukey's multiple comparisons test)</b>                           | <b>Summary</b> | <b>Adjusted P Value</b> |
|----------------------------------------------------------------------------|----------------|-------------------------|
| Control vs. <i>Syx4</i> <sup>73</sup>                                      | *              | 0.033                   |
| Control vs. <i>Syx4</i> <sup>73</sup> 24B-GAL4>UAS-Syx4                    | ns             | 0.923                   |
| Control vs. <i>Syx4</i> <sup>73</sup> elav-GAL4>UAS-Syx4                   | *              | 0.045                   |
| Control vs. 24B-GAL4>UAS-Syx4                                              | ns             | 0.864                   |
| <i>Syx4</i> <sup>73</sup> vs. <i>Syx4</i> <sup>73</sup> 24B-GAL4>UAS-Syx4  | *              | 0.030                   |
| <i>Syx4</i> <sup>73</sup> vs. <i>Syx4</i> <sup>73</sup> elav-GAL4>UAS-Syx4 | ns             | > 0.999                 |

**Figure 3E: Brp/HRP**

| Genotype                              | n  | Mean  | SEM  |
|---------------------------------------|----|-------|------|
| Control                               | 20 | 72.55 | 2.83 |
| Syx4 <sup>73</sup>                    | 20 | 71.95 | 2.93 |
| Syx4 <sup>73</sup> 24B-GAL4>UAS-Syx4  | 20 | 75.56 | 2.14 |
| Syx4 <sup>73</sup> elav-GAL4>UAS-Syx4 | 20 | 72.53 | 2.89 |
| 24B-GAL4>UAS-Syx4                     | 20 | 74.11 | 3.32 |

| ANOVA (Tukey's multiple comparisons test)                    | Summary | Adjusted P Value |
|--------------------------------------------------------------|---------|------------------|
| Control vs. Syx4 <sup>73</sup>                               | ns      | >0.999           |
| Control vs. Syx4 <sup>73</sup> 24B-GAL4>UAS-Syx4             | ns      | 0.945            |
| Control vs. Syx4 <sup>73</sup> elav-GAL4>UAS-Syx4            | ns      | > 0.999          |
| Control vs. 24B-GAL4>UAS-Syx4                                | ns      | 0.995            |
| Syx4 <sup>73</sup> vs. Syx4 <sup>73</sup> 24B-GAL4>UAS-Syx4  | ns      | 0.898            |
| Syx4 <sup>73</sup> vs. Syx4 <sup>73</sup> elav-GAL4>UAS-Syx4 | ns      | > 0.999          |

**HRP fluorescence intensity**

| Genotype                              | n  | Mean  | SEM  |
|---------------------------------------|----|-------|------|
| Control                               | 20 | 49.14 | 2.94 |
| Syx4 <sup>73</sup>                    | 20 | 43.47 | 4.27 |
| Syx4 <sup>73</sup> 24B-GAL4>UAS-Syx4  | 20 | 46.03 | 2.32 |
| Syx4 <sup>73</sup> elav-GAL4>UAS-Syx4 | 20 | 46.26 | 5.85 |
| 24B-GAL4>UAS-Syx4                     | 20 | 43.97 | 2.51 |

| ANOVA (Tukey's multiple comparisons test)                    | Summary | Adjusted P Value |
|--------------------------------------------------------------|---------|------------------|
| Control vs. Syx4 <sup>73</sup>                               | ns      | 0.800            |
| Control vs. Syx4 <sup>73</sup> 24B-GAL4>UAS-Syx4             | ns      | 0.977            |
| Control vs. Syx4 <sup>73</sup> elav-GAL4>UAS-Syx4            | ns      | 0.983            |
| Control vs. 24B-GAL4>UAS-Syx4                                | ns      | 0.870            |
| Syx4 <sup>73</sup> vs. Syx4 <sup>73</sup> 24B-GAL4>UAS-Syx4  | ns      | 0.984            |
| Syx4 <sup>73</sup> vs. Syx4 <sup>73</sup> elav-GAL4>UAS-Syx4 | ns      | > 0.999          |

**Figure 4A: EJP versus [Ca2+]**

| Genotype ([Ca2+])                           | n | mean  | SEM  |
|---------------------------------------------|---|-------|------|
| Control (0.3)                               | 6 | 2.84  | 0.37 |
| Control (0.5)                               | 6 | 6.73  | 1.76 |
| Control (0.7)                               | 6 | 23.20 | 2.07 |
| Control (1.0)                               | 6 | 31.85 | 1.08 |
| Syx4 <sup>73</sup> (0.3)                    | 6 | 6.55  | 0.63 |
| Syx4 <sup>73</sup> (0.5)                    | 6 | 15.20 | 1.74 |
| Syx4 <sup>73</sup> (0.7)                    | 6 | 31.25 | 2.88 |
| Syx4 <sup>73</sup> (1.0)                    | 6 | 32.31 | 1.74 |
| Syx4 <sup>73</sup> 24B-GAL4>UAS-Syx4 (0.3)  | 6 | 2.32  | 0.40 |
| Syx4 <sup>73</sup> 24B-GAL4>UAS-Syx4 (0.5)  | 6 | 5.87  | 0.67 |
| Syx4 <sup>73</sup> 24B-GAL4>UAS-Syx4 (0.7)  | 6 | 16.00 | 3.03 |
| Syx4 <sup>73</sup> 24B-GAL4>UAS-Syx4 (1.0)  | 5 | 30.27 | 3.07 |
| Syx4 <sup>73</sup> elav-GAL4>UAS-Syx4 (0.3) | 6 | 6.43  | 0.63 |
| Syx4 <sup>73</sup> elav-GAL4>UAS-Syx4 (0.5) | 6 | 16.07 | 0.97 |

|                                             |   |       |      |
|---------------------------------------------|---|-------|------|
| Syx4 <sup>73</sup> elav-GAL4>UAS-Syx4 (0.7) | 5 | 32.34 | 1.63 |
| Syx4 <sup>73</sup> elav-GAL4>UAS-Syx4 (1.0) | 6 | 30.81 | 1.67 |
| 24B-GAL4>UAS-Syx4 (0.3)                     | 6 | 2.34  | 0.46 |
| 24B-GAL4>UAS-Syx4 (0.5)                     | 6 | 7.29  | 0.96 |
| 24B-GAL4>UAS-Syx4 (0.7)                     | 5 | 18.93 | 1.92 |
| 24B-GAL4>UAS-Syx4 (1.0)                     | 6 | 32.71 | 2.19 |

| ANOVA (Tukey's multiple comparisons test)                    | Summary | Adjusted P Value |
|--------------------------------------------------------------|---------|------------------|
| <b>0.3 mM Ca2+</b>                                           |         |                  |
| Control vs. Syx4 <sup>73</sup>                               | ***     | 0.0002           |
| Control vs. Syx4 <sup>73</sup> 24B-GAL4>UAS-Syx4             | ns      | 0.949            |
| Control vs. Syx4 <sup>73</sup> elav-GAL4>UAS-Syx4            | ***     | 0.0004           |
| Control vs. 24B-GAL4>UAS-Syx4                                | ns      | 0.954            |
| Syx4 <sup>73</sup> vs. Syx4 <sup>73</sup> 24B-GAL4>UAS-Syx4  | ****    | < 0.0001         |
| Syx4 <sup>73</sup> vs. Syx4 <sup>73</sup> elav-GAL4>UAS-Syx4 | ns      | >0.999           |
| <b>0.5 mM Ca2+</b>                                           |         |                  |
| Control vs. Syx4 <sup>73</sup>                               | ***     | 0.001            |
| Control vs. Syx4 <sup>73</sup> 24B-GAL4>UAS-Syx4             | ns      | 0.990            |
| Control vs. Syx4 <sup>73</sup> elav-GAL4>UAS-Syx4            | ***     | 0.0003           |
| Control vs. 24B-GAL4>UAS-Syx4                                | ns      | 0.998            |
| Syx4 <sup>73</sup> vs. Syx4 <sup>73</sup> 24B-GAL4>UAS-Syx4  | ***     | 0.0003           |
| Syx4 <sup>73</sup> vs. Syx4 <sup>73</sup> elav-GAL4>UAS-Syx4 | ns      | 0.989            |
| <b>0.7 mM Ca2+</b>                                           |         |                  |
| Control vs. Syx4 <sup>73</sup>                               | *       | 0.043            |
| Control vs. Syx4 <sup>73</sup> 24B-GAL4>UAS-Syx4             | ns      | 0.607            |
| Control vs. Syx4 <sup>73</sup> elav-GAL4>UAS-Syx4            | *       | 0.039            |
| Control vs. 24B-GAL4>UAS-Syx4                                | ns      | 0.960            |
| Syx4 <sup>73</sup> vs. Syx4 <sup>73</sup> 24B-GAL4>UAS-Syx4  | **      | 0.002            |
| Syx4 <sup>73</sup> vs. Syx4 <sup>73</sup> elav-GAL4>UAS-Syx4 | ns      | >0.999           |
| <b>1.0 mM Ca2+</b>                                           |         |                  |
| Control vs. Syx4 <sup>73</sup>                               | ns      | >0.999           |
| Control vs. Syx4 <sup>73</sup> 24B-GAL4>UAS-Syx4             | ns      | 0.981            |
| Control vs. Syx4 <sup>73</sup> elav-GAL4>UAS-Syx4            | ns      | 0.995            |
| Control vs. 24B-GAL4>UAS-Syx4                                | ns      | 0.998            |
| Syx4 <sup>73</sup> vs. Syx4 <sup>73</sup> 24B-GAL4>UAS-Syx4  | ns      | 0.953            |
| Syx4 <sup>73</sup> vs. Syx4 <sup>73</sup> elav-GAL4>UAS-Syx4 | ns      | 0.981            |

**Figure 4B: Quantal content versus [Ca2+]**

| Genotype ([Ca2+])                          | n | mean  | SEM  |
|--------------------------------------------|---|-------|------|
| Control (0.3)                              | 6 | 2.89  | 0.38 |
| Control (0.5)                              | 6 | 8.73  | 1.94 |
| Control (0.7)                              | 6 | 24.37 | 2.56 |
| Control (1.0)                              | 6 | 38.84 | 1.45 |
| Syx4 <sup>73</sup> (0.3)                   | 6 | 6.79  | 0.67 |
| Syx4 <sup>73</sup> (0.5)                   | 6 | 16.59 | 2.00 |
| Syx4 <sup>73</sup> (0.7)                   | 6 | 37.77 | 3.95 |
| Syx4 <sup>73</sup> (1.0)                   | 6 | 39.27 | 2.70 |
| Syx4 <sup>73</sup> 24B-GAL4>UAS-Syx4 (0.3) | 6 | 2.35  | 0.41 |

|                                             |   |       |      |
|---------------------------------------------|---|-------|------|
| Syx4 <sup>73</sup> 24B-GAL4>UAS-Syx4 (0.5)  | 6 | 6.08  | 0.71 |
| Syx4 <sup>73</sup> 24B-GAL4>UAS-Syx4 (0.7)  | 6 | 17.98 | 3.96 |
| Syx4 <sup>73</sup> 24B-GAL4>UAS-Syx4 (1.0)  | 5 | 36.60 | 4.32 |
| Syx4 <sup>73</sup> elav-GAL4>UAS-Syx4 (0.3) | 6 | 6.68  | 0.69 |
| Syx4 <sup>73</sup> elav-GAL4>UAS-Syx4 (0.5) | 6 | 17.61 | 1.15 |
| Syx4 <sup>73</sup> elav-GAL4>UAS-Syx4 (0.7) | 5 | 38.61 | 2.10 |
| Syx4 <sup>73</sup> elav-GAL4>UAS-Syx4 (1.0) | 6 | 36.33 | 2.43 |
| 24B-GAL4>UAS-Syx4 (0.3)                     | 6 | 2.37  | 0.47 |
| 24B-GAL4>UAS-Syx4 (0.5)                     | 6 | 7.60  | 1.05 |
| 24B-GAL4>UAS-Syx4 (0.7)                     | 5 | 21.23 | 2.51 |
| 24B-GAL4>UAS-Syx4 (1.0)                     | 6 | 40.07 | 3.02 |

| ANOVA (Tukey's multiple comparisons test)                    | Summary | Adjusted P Value |
|--------------------------------------------------------------|---------|------------------|
| <b>0.3 mM Ca2+</b>                                           |         |                  |
| Control vs. Syx4 <sup>73</sup>                               | ***     | 0.0002           |
| Control vs. Syx4 <sup>73</sup> 24B-GAL4>UAS-Syx4             | ns      | 0.995            |
| Control vs. Syx4 <sup>73</sup> elav-GAL4>UAS-Syx4            | ***     | 0.0003           |
| Control vs. 24B-GAL4>UAS-Syx4                                | ns      | 0.960            |
| Syx4 <sup>73</sup> vs. Syx4 <sup>73</sup> 24B-GAL4>UAS-Syx4  | ****    | < 0.0001         |
| Syx4 <sup>73</sup> vs. Syx4 <sup>73</sup> elav-GAL4>UAS-Syx4 | ns      | >0.999           |
| <b>0.5 mM Ca2+</b>                                           |         |                  |
| Control vs. Syx4 <sup>73</sup>                               | **      | 0.007            |
| Control vs. Syx4 <sup>73</sup> 24B-GAL4>UAS-Syx4             | ns      | 0.704            |
| Control vs. Syx4 <sup>73</sup> elav-GAL4>UAS-Syx4            | **      | 0.0020           |
| Control vs. 24B-GAL4>UAS-Syx4                                | ns      | 0.981            |
| Syx4 <sup>73</sup> vs. Syx4 <sup>73</sup> 24B-GAL4>UAS-Syx4  | ***     | 0.0003           |
| Syx4 <sup>73</sup> vs. Syx4 <sup>73</sup> elav-GAL4>UAS-Syx4 | ns      | 0.987            |
| <b>0.7 mM Ca2+</b>                                           |         |                  |
| Control vs. Syx4 <sup>73</sup>                               | ns      | 0.153            |
| Control vs. Syx4 <sup>73</sup> 24B-GAL4>UAS-Syx4             | ns      | 0.238            |
| Control vs. Syx4 <sup>73</sup> elav-GAL4>UAS-Syx4            | ns      | 0.105            |
| Control vs. 24B-GAL4>UAS-Syx4                                | ns      | 0.745            |
| Syx4 <sup>73</sup> vs. Syx4 <sup>73</sup> 24B-GAL4>UAS-Syx4  | **      | 0.001            |
| Syx4 <sup>73</sup> vs. Syx4 <sup>73</sup> elav-GAL4>UAS-Syx4 | ns      | 0.998            |
| <b>1.0 mM Ca2+</b>                                           |         |                  |
| Control vs. Syx4 <sup>73</sup>                               | ns      | >0.999           |
| Control vs. Syx4 <sup>73</sup> 24B-GAL4>UAS-Syx4             | ns      | 0.986            |
| Control vs. Syx4 <sup>73</sup> elav-GAL4>UAS-Syx4            | ns      | 0.967            |
| Control vs. 24B-GAL4>UAS-Syx4                                | ns      | 0.998            |
| Syx4 <sup>73</sup> vs. Syx4 <sup>73</sup> 24B-GAL4>UAS-Syx4  | ns      | 0.965            |
| Syx4 <sup>73</sup> vs. Syx4 <sup>73</sup> elav-GAL4>UAS-Syx4 | ns      | 0.943            |

**Figure 4C**

| Linear regression                    |       |      |
|--------------------------------------|-------|------|
| Genotype                             | Slope | SEM  |
| Control                              | 2.64  | 0.22 |
| Syx4 <sup>73</sup>                   | 1.65  | 0.20 |
| Syx4 <sup>73</sup> 24B-GAL4>UAS-Syx4 | 2.42  | 0.26 |

|                                       |      |      |
|---------------------------------------|------|------|
| Syx4 <sup>73</sup> elav-GAL4>UAS-Syx4 | 1.67 | 0.24 |
| 24B-GAL4>UAS-Syx4                     | 2.58 | 0.27 |

| <b>ANOVA (Tukey's multiple comparisons test)</b>  | <b>Summary</b> | <b>Adjusted P Value</b> |
|---------------------------------------------------|----------------|-------------------------|
| Control vs. Syx4 <sup>73</sup>                    | *              | 0.039                   |
| Control vs. Syx4 <sup>73</sup> 24B-GAL4>UAS-Syx4  | ns             | 0.969                   |
| Control vs. Syx4 <sup>73</sup> elav-GAL4>UAS-Syx4 | *              | 0.045                   |
| Control vs. 24B-GAL4>UAS-Syx4                     | ns             | >0.999                  |
